# Supplementary material for: Co-Administration of Iron and Bioavailable Curcumin Reduces Levels of Systemic Markers of Inflammation and Oxidative Stress in a Placebo-Controlled Randomised Study
Source: MDPI journal article supplement (doi:10.3390/nu14030712), 2022-02-08
Supplement: s1 [file s1]

**Supplementary Table S1:** Summary results of chronic iron and curcumin supplementation on inflammatory and iron status markers. Results are presented as mean difference, standard error of difference, *p* value and significance where \* represents significance values when comparing time points within the same conditions (\* *p* < 0.05, \*\* *p* < 0.01, \*\*\* *p* < 0.001, \*\*\*\* *p* < 0.0001); <sup>ns</sup> indicates no significant difference (*p* > 0.05).

| Biomarker            | Groups    | Time points | Whole group |       |       |            |         |     |    |       |       |            | Subgroup analysis based on baseline serum ferritin levels (ng/mL) |        |    |       |       |            |         |      |        |       |      |            |         |      |        |        |      |            |         |      |         |        |   |
|----------------------|-----------|-------------|-------------|-------|-------|------------|---------|-----|----|-------|-------|------------|-------------------------------------------------------------------|--------|----|-------|-------|------------|---------|------|--------|-------|------|------------|---------|------|--------|--------|------|------------|---------|------|---------|--------|---|
|                      |           |             |             |       |       |            |         |     |    |       |       |            | <50                                                               |        |    |       |       |            |         |      |        |       | >50  |            |         |      |        |        |      |            |         |      |         |        |   |
|                      |           |             | N           | Mean  | Diff  | SE of diff | p value | Sig | N  | Mean  | Diff  | SE of diff | p value                                                           | Sig    | N  | Mean  | Diff  | SE of diff | p value | Sig  | N      | Mean  | Diff | SE of diff | p value | Sig  | N      | Mean   | Diff | SE of diff | p value | Sig  |         |        |   |
| Plasma CRP (ng/mL)   | F50_Plac  | B vs M      | 30          | -0.21 | 0.22  | 0.5040     |         |     | 13 | -0.24 | 0.15  | 0.0974     |                                                                   |        | 17 | -0.18 | -0.11 | 0.36       | 0.9538  |      | 17     | -0.43 | 0.17 | 0.0550     |         | 13   | 14     | 0.07   | 0.44 | 0.9877     |         |      |         |        |   |
|                      |           | B vs E      | 30          | -1.08 | 0.11  | 0.3583     |         |     | 13 | -1.22 | 0.31  | 0.21       | 0.3490                                                            |        |    | 17    | -1.61 | 1.76       | 0.6380  |      | 17     | -0.22 | 0.17 | 0.4365     |         | 13   | 14     | -1.95  | 2.19 | 0.6549     |         |      |         |        |   |
|                      |           | M vs E      | 30          | -0.87 | 1.06  | 0.6959     |         |     | 13 | -1.22 | 0.03  | 0.25       | 0.9921                                                            |        |    | 17    | -1.50 | 0.80       | 0.6861  |      | 16     | -0.21 | 0.23 | 0.6798     |         | 14   | 14     | -2.02  | 2.20 | 0.6385     |         |      |         |        |   |
|                      | F518_Plac | B vs M      | 31          | 29    | -0.01 | 0.45       | 0.9902  |     |    | 9     | -0.21 | 0.45       | 0.8902                                                            |        |    | 22    | -0.31 | 0.45       | 0.8902  |      | 15     | -0.31 | 0.45 | 0.8902     |         | 16   | 16     | -0.48  | 0.36 | 0.4607     |         |      |         |        |   |
|                      |           | B vs E      | 31          | 29    | 0.06  | 0.25       | 0.9731  |     |    | 9     | 7     | -0.44      | 0.44                                                              | 0.6135 |    |       | 22    | 22         | 0.23    | 0.30 | 0.7240 |       | 15   | 13         | -0.28   | 0.26 | 0.5497 |        | 16   | 16         | 0.36    | 0.40 | 0.6470  |        |   |
|                      |           | M vs E      | 30          | 29    | 0.27  | 0.23       | 0.4906  |     |    | 9     | 7     | 1.17       | 0.80                                                              | 0.3752 |    |       | 22    | 22         | 0.08    | 0.24 | 0.4968 |       | 14   | 13         | -0.70   | 0.38 | 0.2059 |        | 16   | 16         | -0.12   | 0.32 | 0.9290  |        |   |
|                      | F518_Curc | B vs M      | 31          | 31    | 0.43  | 0.35       | 0.4516  |     |    | 10    | 10    | 0.63       | 0.43                                                              | 0.4516 |    |       | 21    | 21         | 0.13    | 0.41 | 0.5717 |       | 15   | 15         | 0.40    | 0.50 | 0.4659 |        | 16   | 16         | 0.24    | 0.29 | 0.6302  |        |   |
|                      |           | B vs E      | 31          | 31    | 0.15  | 0.50       | 0.9510  |     |    | 10    | 10    | 0.62       | 0.73                                                              | 0.6778 |    |       | 21    | 21         | -0.08   | 0.65 | 0.9926 |       | 15   | 15         | 0.71    | 0.55 | 0.4167 |        | 16   | 16         | -0.03   | 0.95 | 0.5491  |        |   |
|                      |           | M vs E      | 31          | 31    | -0.17 | 0.28       | 0.8766  |     |    | 10    | 10    | -0.01      | 0.19                                                              | 0.9989 |    |       | 21    | 21         | -0.24   | 0.41 | 0.8271 |       | 15   | 15         | 0.13    | 0.23 | 0.4849 |        | 16   | 16         | -0.78   | 0.72 | 0.5458  |        |   |
|                      | F565_Plac | B vs M      | 30          | 30    | 0.31  | 0.28       | 0.5148  |     |    | 12    | 12    | 0.18       | 0.28                                                              | 0.7936 |    |       | 18    | 18         | 0.40    | 0.44 | 0.4046 |       | 19   | 19         | 0.18    | 0.18 | 0.5814 |        | 11   | 11         | 0.54    | 0.72 | 0.7437  |        |   |
|                      |           | B vs E      | 30          | 30    | 0.26  | 0.17       | 0.2081  |     |    | 12    | 12    | 0.20       | 0.31                                                              | 0.7942 |    |       | 18    | 18         | 0.39    | 0.40 | 0.4790 |       | 19   | 19         | 0.33    | 0.20 | 0.5566 |        | 11   | 11         | 0.39    | 0.36 | 0.4438  |        |   |
|                      |           | M vs E      | 30          | 30    | -0.02 | 0.22       | 0.9949  |     |    | 12    | 12    | 0.02       | 0.26                                                              | 0.9668 |    |       | 18    | 18         | -0.05   | 0.33 | 0.9881 |       | 19   | 19         | 0.05    | 0.17 | 0.9544 |        | 11   | 11         | -0.14   | 0.53 | 0.9616  |        |   |
|                      | F565_Curc | B vs M      | 31          | 29    | -0.01 | 0.31       | 0.9988  |     |    | 10    | 9     | 0.49       | 0.39                                                              | 0.4647 |    |       | 21    | 20         | -0.44   | 0.41 | 0.8264 |       | 16   | 14         | -0.45   | 0.32 | 0.3813 |        | 15   | 15         | -0.45   | 0.50 | 0.6512  |        |   |
|                      |           | B vs E      | 31          | 29    | 0.25  | 0.15       | 0.2513  |     |    | 10    | 9     | -0.61      | 0.44                                                              | 0.6970 |    |       | 21    | 20         | 0.19    | 0.12 | 0.2345 |       | 16   | 14         | 0.20    | 0.28 | 0.7652 |        | 15   | 15         | 0.26    | 0.39 | 0.5140  |        |   |
|                      |           | M vs E      | 31          | 29    | 0.26  | 0.30       | 0.8563  |     |    | 9     | 9     | -0.13      | 0.21                                                              | 0.8246 |    |       | 20    | 20         | -0.43   | 0.42 | 0.5635 |       | 16   | 14         | -0.25   | 0.22 | 0.5237 |        | 15   | 15         | -0.74   | 0.52 | 0.5554  |        |   |
| Plasma IL-6 (pg/mL)  | F50_Plac  | B vs M      | 29          | 30    | -0.01 | 0.01       | 0.4011  |     |    | 12    | 12    | -0.01      | 0.02                                                              | 0.7795 |    |       | 17    | 18         | -0.02   | 0.01 | 0.5353 |       | 16   | 16         | -0.01   | 0.01 | 0.5735 |        | 13   | 14         | -0.01   | 0.02 | 0.7172  |        |   |
|                      |           | B vs E      | 29          | 29    | 0.00  | 0.01       | 0.9816  |     |    | 12    | 12    | 0.00       | 0.01                                                              | 0.9816 |    |       | 17    | 17         | 0.00    | 0.01 | 0.9930 |       | 16   | 16         | -0.01   | 0.01 | 0.6750 |        | 13   | 14         | 0.00    | 0.02 | 0.9804  |        |   |
|                      |           | M vs E      | 29          | 29    | 0.01  | 0.02       | 0.7552  |     |    | 12    | 12    | 0.01       | 0.02                                                              | 0.6652 |    |       | 17    | 17         | 0.00    | 0.01 | 0.9930 |       | 16   | 16         | -0.01   | 0.01 | 0.6750 |        | 13   | 14         | 0.00    | 0.02 | 0.9804  |        |   |
|                      | F518_Plac | B vs M      | 31          | 29    | -0.02 | 0.05       | 0.9726  |     |    | 9     | 8     | -0.16      | 0.08                                                              | 0.1742 |    |       | 22    | 21         | 0.04    | 0.06 | 0.8349 |       | 15   | 14         | -0.12   | 0.05 | 0.0736 |        | 16   | 15         | 0.08    | 0.09 | 0.6386  |        |   |
|                      |           | B vs E      | 31          | 29    | 0.02  | 0.05       | 0.8970  |     |    | 9     | 7     | -0.06      | 0.03                                                              | 0.2464 |    |       | 22    | 22         | 0.05    | 0.06 | 0.6596 |       | 15   | 13         | -0.05   | 0.02 | 0.0662 |        | 16   | 16         | 0.09    | 0.08 | 0.5281  |        |   |
|                      |           | M vs E      | 31          | 29    | 0.04  | 0.05       | 0.5277  |     |    | 10    | 10    | 0.04       | 0.05                                                              | 0.1203 |    |       | 22    | 22         | 0.09    | 0.06 | 0.3351 |       | 15   | 13         | -0.01   | 0.04 | 0.9351 |        | 16   | 16         | 0.01    | 0.02 | 0.9349  |        |   |
|                      | F518_Curc | B vs M      | 31          | 31    | -0.01 | 0.02       | 0.9025  |     |    | 10    | 10    | 0.03       | 0.04                                                              | 0.6913 |    |       | 21    | 21         | -0.03   | 0.02 | 0.3273 |       | 16   | 16         | 0.00    | 0.02 | 0.9723 |        | 10   | 10         | -0.04   | 0.04 | 0.5848  |        |   |
|                      |           | B vs E      | 31          | 31    | -0.02 | 0.03       | 0.7565  |     |    | 10    | 10    | 0.05       | 0.10                                                              | 0.8744 |    |       | 21    | 21         | -0.04   | 0.02 | 0.7746 |       | 16   | 16         | -0.05   | 0.02 | 0.7427 |        | 10   | 10         | 0.00    | 0.02 | 0.9963  |        |   |
|                      |           | M vs E      | 31          | 31    | -0.02 | 0.03       | 0.8548  |     |    | 10    | 10    | -0.08      | 0.08                                                              | 0.5580 |    |       | 21    | 21         | 0.02    | 0.02 | 0.8964 |       | 16   | 16         | -0.04   | 0.04 | 0.5853 |        | 10   | 10         | -0.04   | 0.03 | 0.3404  |        |   |
|                      | F565_Plac | B vs M      | 30          | 30    | -0.01 | 0.01       | 0.9787  |     |    | 12    | 12    | -0.01      | 0.02                                                              | 0.3270 |    |       | 18    | 18         | 0.00    | 0.01 | 0.9901 |       | 19   | 19         | 0.01    | 0.01 | 0.8481 |        | 11   | 11         | 0.01    | 0.04 | 0.8749  |        |   |
|                      |           | B vs E      | 30          | 30    | 0.00  | 0.01       | 0.9859  |     |    | 12    | 12    | -0.02      | 0.02                                                              | 0.7272 |    |       | 18    | 18         | 0.02    | 0.02 | 0.6162 |       | 19   | 19         | -0.02   | 0.02 | 0.5951 |        | 11   | 11         | 0.03    | 0.02 | 0.3885  |        |   |
|                      |           | M vs E      | 30          | 30    | 0.01  | 0.01       | 0.8576  |     |    | 12    | 12    | 0.01       | 0.03                                                              | 0.9014 |    |       | 18    | 18         | 0.01    | 0.02 | 0.5850 |       | 19   | 19         | 0.01    | 0.02 | 0.9053 |        | 11   | 11         | 0.02    | 0.03 | 0.5230  |        |   |
|                      | F565_Curc | B vs M      | 31          | 29    | 0.02  | 0.04       | 0.5850  |     |    | 10    | 9     | 0.09       | 0.12                                                              | 0.7215 |    |       | 21    | 20         | -0.01   | 0.03 | 0.8743 |       | 16   | 14         | 0.04    | 0.08 | 0.8854 |        | 15   | 15         | 0.00    | 0.02 | 0.4484  |        |   |
|                      |           | B vs E      | 31          | 29    | 0.02  | 0.04       | 0.5164  |     |    | 10    | 9     | 0.09       | 0.13                                                              | 0.7490 |    |       | 21    | 20         | 0.04    | 0.02 | 0.4979 |       | 16   | 14         | 0.07    | 0.08 | 0.6484 |        | 15   | 15         | 0.05    | 0.02 | 0.4484  |        |   |
|                      |           | M vs E      | 31          | 29    | 0.04  | 0.02       | 0.5166  |     |    | 9     | 9     | 0.00       | 0.03                                                              | 0.9920 |    |       | 20    | 20         | 0.06    | 0.02 | 0.0073 |       | **   | 14         | 14      | 0.03 | 0.03   | 0.4968 |      | 15         | 15      | 0.04 | 0.01    | 0.8255 | * |
| Plasma TNF (pg/mL)   | F50_Plac  | B vs M      | 29          | 30    | -0.44 | 0.29       | 0.3069  |     |    | 12    | 12    | -0.73      | 0.61                                                              | 0.4835 |    |       | 17    | 18         | -0.23   | 0.29 | 0.7041 |       | 16   | 16         | -0.64   | 0.45 | 0.3386 |        | 13   | 14         | -0.20   | 0.37 | 0.8579  |        |   |
|                      |           | B vs E      | 29          | 29    | 0.16  | 0.40       | 0.7020  |     |    | 12    | 12    | 0.16       | 0.40                                                              | 0.7020 |    |       | 17    | 17         | 0.38    | 0.27 | 0.1683 |       | 16   | 16         | -0.64   | 0.45 | 0.3386 |        | 13   | 14         | -0.20   | 0.37 | 0.8579  |        |   |
|                      |           | M vs E      | 29          | 29    | 0.48  | 0.29       | 0.2358  |     |    | 12    | 12    | -0.52      | 0.67                                                              | 0.7225 |    |       | 18    | 17         | 0.44    | 0.17 | 0.0510 |       | 16   | 15         | -0.55   | 0.53 | 0.5598 |        | 14   | 14         | 0.39    | 0.20 | 0.1562  |        |   |
|                      | F518_Plac | B vs M      | 31          | 29    | -0.15 | 0.15       | 0.5862  |     |    | 9     | 8     | -0.56      | 0.30                                                              | 0.2116 |    |       | 22    | 21         | 0.02    | 0.17 | 0.9953 |       | 15   | 14         | -0.43   | 0.18 | 0.0867 |        | 16   | 15         | 0.11    | 0.23 | 0.8807  |        |   |
|                      |           | B vs E      | 31          | 29    | 0.11  | 0.23       | 0.8679  |     |    | 9     | 7     | -0.33      | 0.46                                                              | 0.7608 |    |       | 22    | 22         | 0.30    | 0.26 | 0.4865 |       | 15   | 13         | -0.04   | 0.29 | 0.9889 |        | 16   | 16         | 0.29    | 0.34 | 0.6676  |        |   |
|                      |           | M vs E      | 31          | 29    | 0.26  | 0.27       | 0.2917  |     |    | 10    | 10    | 0.23       | 0.27                                                              | 0.2917 |    |       | 22    | 22         | 0.29    | 0.26 | 0.3307 |       | 14   | 13         | -0.18   | 0.17 | 0.34   |        | 16   | 16         | 0.36    | 0.56 | 0.6668  |        |   |
|                      | F518_Curc | B vs M      | 31          | 31    | -0.08 | 0.19       | 0.9047  |     |    | 10    | 10    | 0.03       | 0.45                                                              | 0.9979 |    |       | 21    | 21         | -0.13   | 0.19 | 0.7602 |       | 15   | 14         | -0.12   | 0.23 | 0.8603 |        | 10   | 10         | 0.00    | 0.35 | -0.9999 |        |   |
|                      |           | B vs E      | 31          | 31    | 0.27  | 0.21       | 0.4887  |     |    | 10    | 10    | 0.23       | 0.39                                                              | 0.8372 |    |       | 21    | 21         | 0.29    | 0.25 | 0.4886 |       | 15   | 14         | -0.25   | 0.23 | 0.5386 |        | 10   | 10         | 0.30    | 0.43 | 0.7703  |        |   |
|                      |           | M vs E      | 31          | 31    | -0.13 | 0.30       | 0.6135  |     |    | 10    | 10    | 0.20       | 0.30                                                              | 0.6135 |    |       | 21    | 21         | 0.37    | 0.18 | 0.0428 |       | 15   | 14         | -0.12   | 0.24 | 0.8427 |        | 10   | 10         | 0.23    | 0.23 | 0.2429  |        |   |
|                      | F565_Plac | B vs M      | 30          | 30    | -0.29 | 0.19       | 0.2984  |     |    | 12    | 12    | -0.02      | 0.30                                                              | 0.3159 |    |       | 18    | 18         | 0.06    | 0.24 | 0.9626 |       | 19   | 19         | -0.26   | 0.23 | 0.5104 |        | 11   | 11         | -0.33   | 0.34 | 0.6094  |        |   |
|                      |           | B vs E      | 30          | 30    | 0.10  | 0.19       | 0.8661  |     |    | 12    | 12    | -0.14      | 0.23                                                              | 0.8256 |    |       | 18    | 18         | 0.26    | 0.28 | 0.6375 |       | 19   | 19         | 0.01    | 0.19 | 0.9983 |        | 11   | 11         | 0.25    | 0.43 | 0.8278  |        |   |
| Plasma IL-18 (pg/mL) | F50_Plac  | B vs M      | 28          | 29    | 0.05  | 0.04       | 0.4559  |     |    | 12    | 12    | 0.02       | 0.02                                                              | 0.3664 |    |       | 17    | 18         | -0.07   | 0.07 | 0.5751 |       | 16   | 16         | 0.02    | 0.02 | 0.2637 |        | 13   | 14         | 0.09    | 0.09 | 0.6030  |        |   |
|                      |           | B vs E      | 29          | 29    | 0.05  | 0.05       | 0.5559  |     |    | 12    | 12    | -0.01      | 0.04                                                              | 0.9479 |    |       | 17    | 17         | 0.10    | 0    |        |       |      |            |         |      |        |        |      |            |         |      |         |        |   |
