# Supplementary material for: Co-Administration of Iron and Bioavailable Curcumin Reduces Levels of Systemic Markers of Inflammation and Oxidative Stress in a Placebo-Controlled Randomised Study
Source: MDPI journal article supplement (doi:10.3390/nu14030712), 2022-02-08
Supplement: s1 [file s1]

| Darker Bowel Movement – Base |           |           |           |           | Darker Bowel Movement - Mid-point |           |           |           |           | Darker Bowel Movement - End-point |           |           |           |           |
|------------------------------|-----------|-----------|-----------|-----------|-----------------------------------|-----------|-----------|-----------|-----------|-----------------------------------|-----------|-----------|-----------|-----------|
| FS0_Plac                     | FS18_Plac | FS18_Curc | FS65_Plac | FS65_Curc | FS0_Plac                          | FS18_Plac | FS18_Curc | FS65_Plac | FS65_Curc | FS0_Plac                          | FS18_Plac | FS18_Curc | FS65_Plac | FS65_Curc |
| X                            | X         | X         | X         | X         | X                                 | X         | X         | X         | X         | X                                 | X         | X         | X         | X         |
| p = .547                     | X         | X         | X         | X         | p = .071                          | X         | X         | X         | X         | p = .070                          | X         | X         | X         | X         |
| p = 1.000                    | p = .416  | X         | X         | X         | p = .610                          | p = .111  | X         | X         | X         | p = 1.000                         | p = .212  | X         | X         | X         |
| p = .498                     | X         | X         | X         | X         | p = .002                          | X         | X         | X         | X         | p = .015                          | X         | X         | X         | X         |
| p = 1.000                    | X         | X         | p = 1.000 | X         | p = .032                          | X         | X         | p = .472  | X         | p = .028                          | X         | X         | p = .912  | X         |

**Table S2.** Outcome of planned Comparisons (Fisher's exact test) with Bonferroni correction\*, for darker bowel movements among all treatment groups and across all time points.

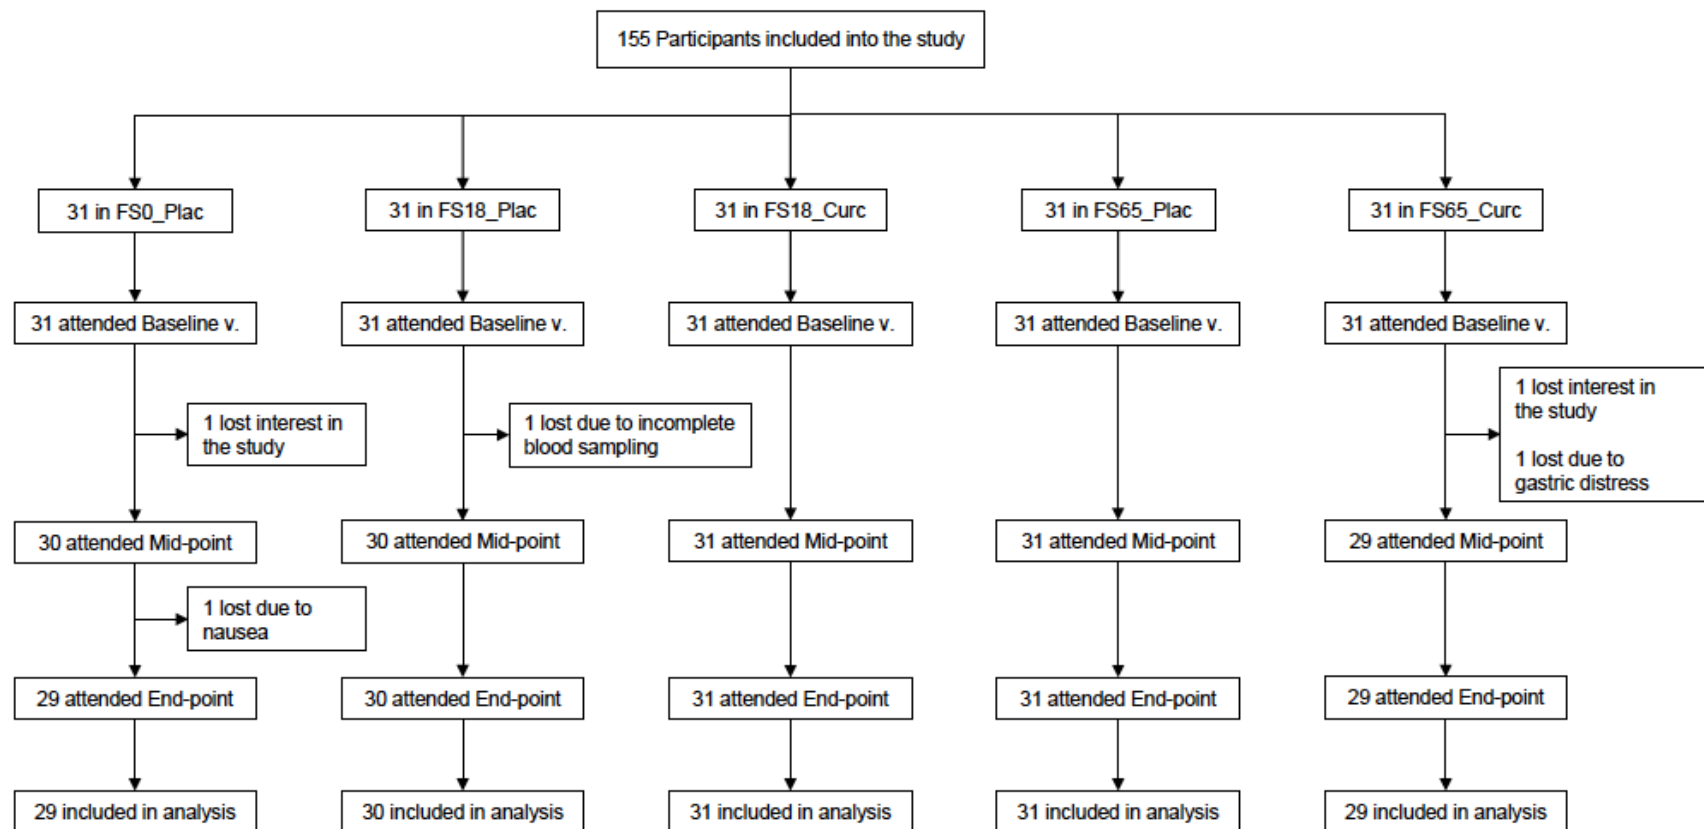

Figure S1. Study compliance after 155 participants were enrolled and randomised equally into 5 treatment groups: FS0\_Plac (full placebo, placebos for both iron and curcumin), FS18+Plac (18 mg elemental iron and placebo for curcumin), FS18\_Curc (18 mg elemental iron and 500 mg curcumin), FS65\_Plac (65 mg elemental iron and placebo for curcumin) and FS65\_Curc (65 mg elemental iron and 500 mg curcumin).
